# Supplementary material
Source: PubMed Central journal article supplement (PMC3709996)
Supplement: 143.8.1348_nutrition179473SupplementaryData1.pdf [file 143.8.1348_nutrition179473SupplementaryData1.pdf]

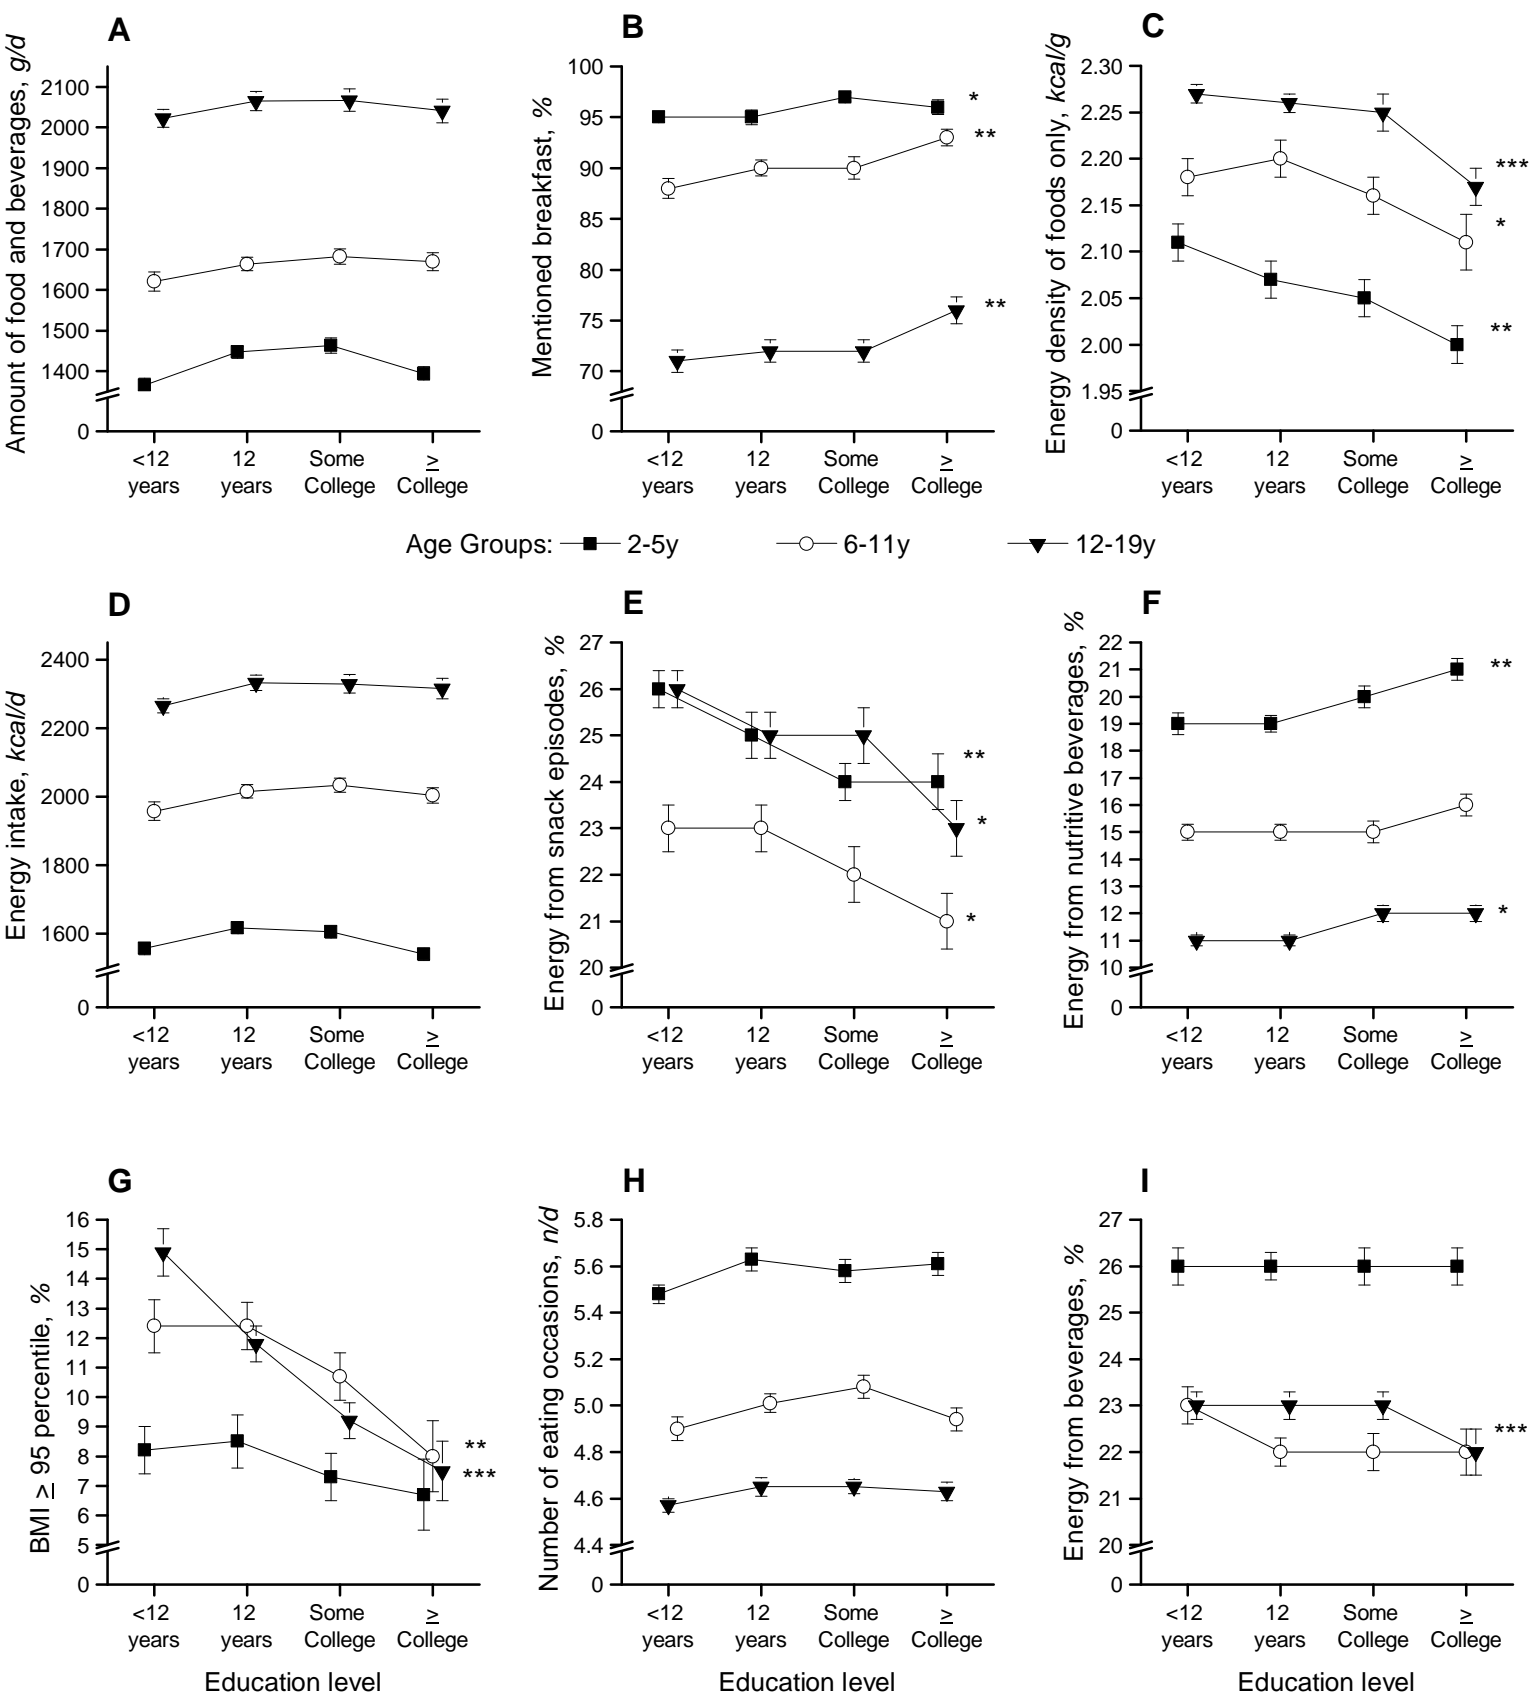

## Online supplemental Material

### Supplemental Figure 1, continued

Values are adjusted means or percentages  $\pm$  SE from multivariable linear or logistic regression models that included each dietary attribute or BMI as a continuous or dichotomous dependent variable. Separate models were run for each age group and included age, sex, race-ethnicity, survey cycle, month of MEC exam, weekday of recalled intake, family PIR, education of household head, household size, and BMI-sex-age-percentile. *n* for models with complete covariate information: 2-5 y (11955); 6-11 y (11016); 12-19 y (16223).

Models for BMI excluded the month of MEC exam, day of recalled intake, and household size.

The data points for the ages 2-5 and 12-19 years on the graphs are shifted slightly to the left and right, respectively, to avoid overlapping.

Asterisks are used to indicate *P* value ranges for education trend:  $P < 0.05$  to  $0.01 = *$ ;  $P < 0.01$  to  $0.001 = **$ ;  $P < 0.001 = ***$

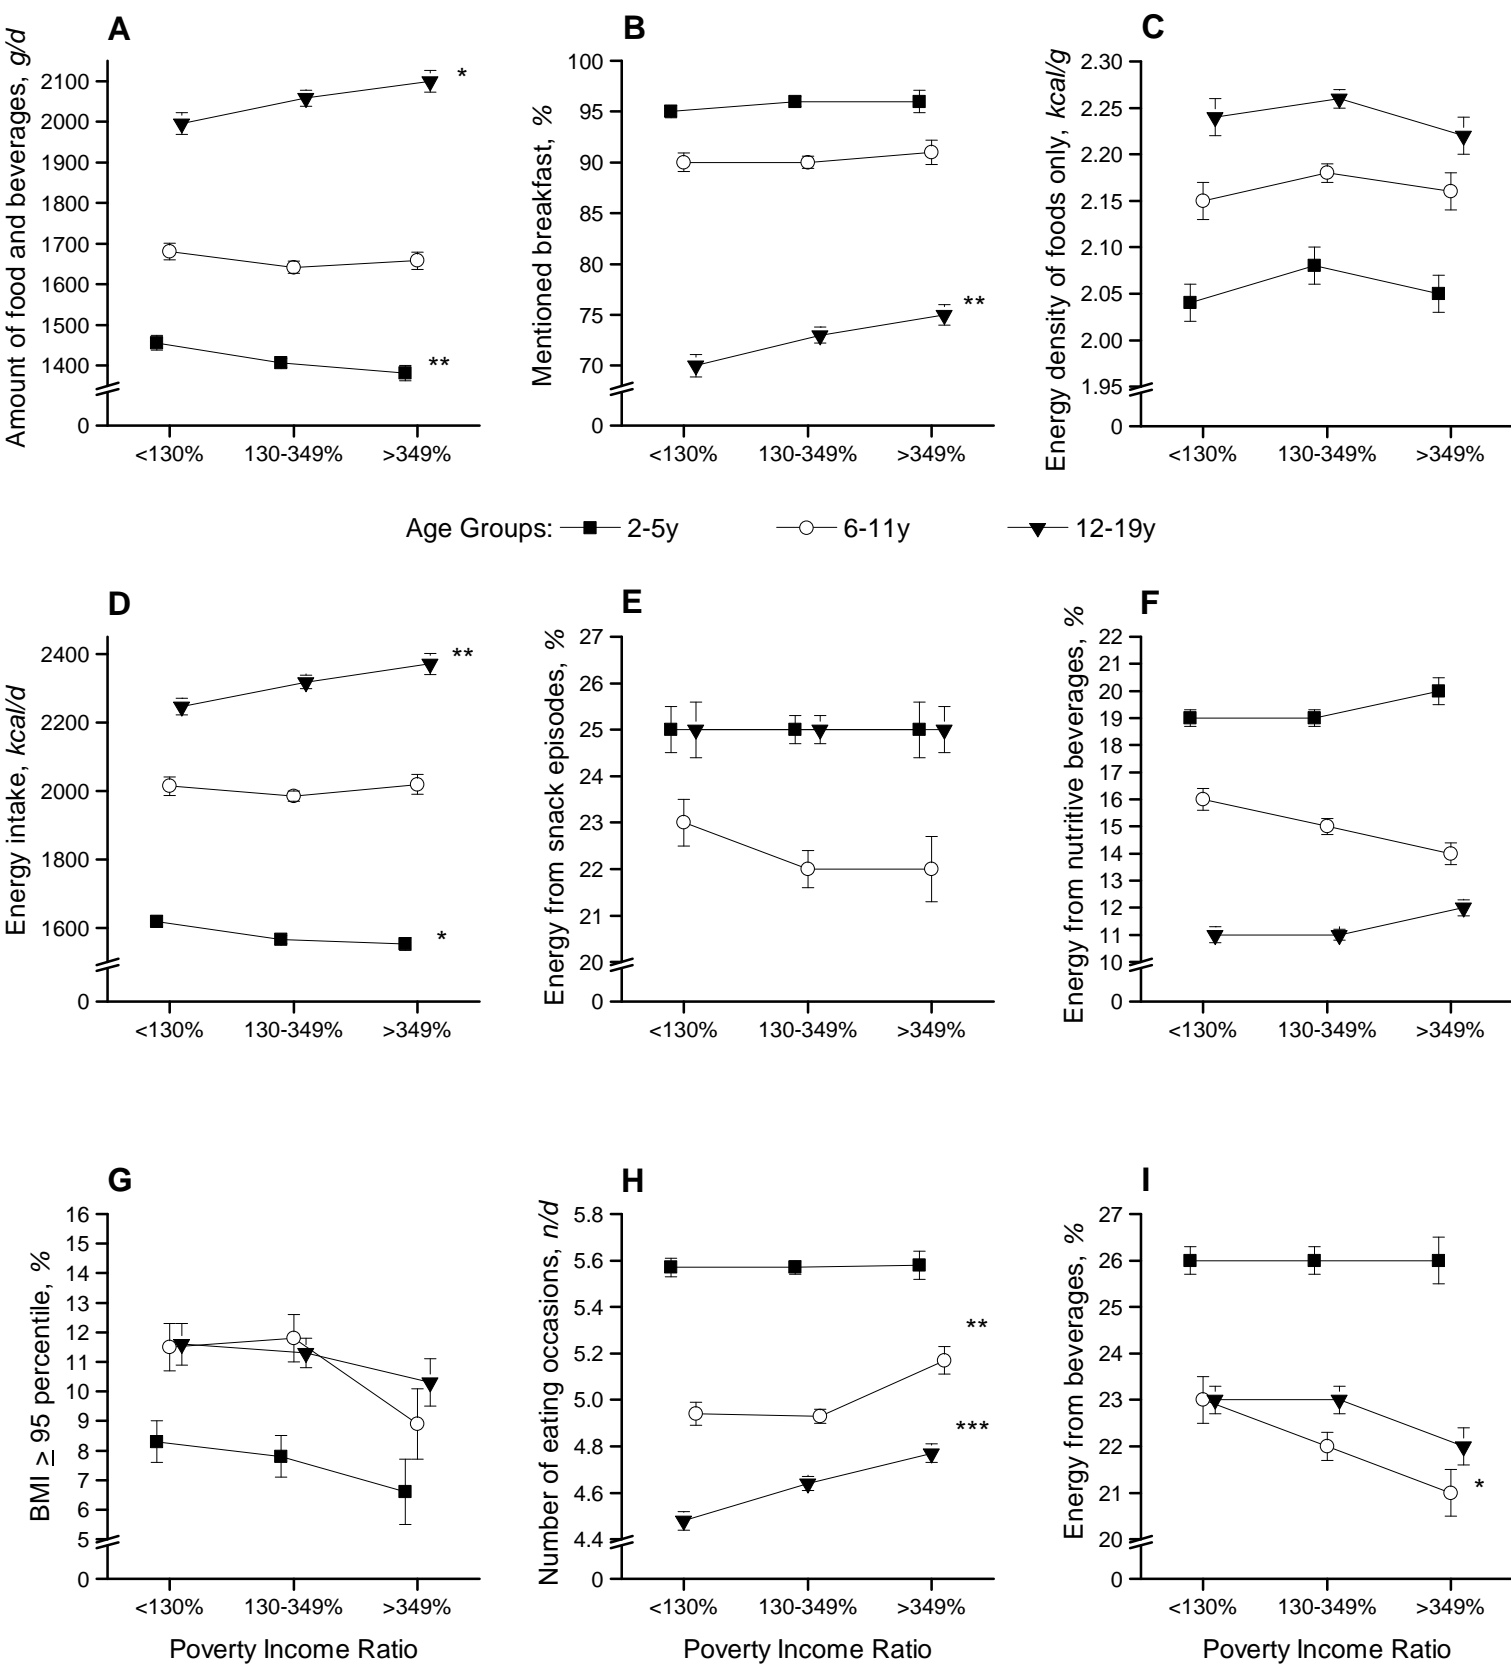

## Online supplemental Material

Supplemental Table 1 Main effect<sup>1</sup> of survey year for dietary and meal behaviors in children and adolescents 2-19 y of age: NHANES 1971-74 to 2003-2008.

| Age group                                                    | NHANES<br>1971-1974 | NHANES<br>1976-1980 | NHANES<br>1988-1994 | NHANES<br>1999-2002 | NHANES<br>2003-2008 | Survey<br>effect <i>P</i> -<br>trend |
|--------------------------------------------------------------|---------------------|---------------------|---------------------|---------------------|---------------------|--------------------------------------|
| <b>BMI<sup>2</sup> ≥95 percentile for gender and age, %</b>  |                     |                     |                     |                     |                     |                                      |
| 2-5 y                                                        | 5.0±0.7             | 5.0±0.6             | 6.9±1.3             | 10.8±1.4            | 10.4±1.4            | <0.0001 ↑ <sup>3</sup>               |
| 6-11 y                                                       | 4.1±0.5             | 6.4±0.6             | 11.4±1.1            | 16.2±1.3            | 17.4±1.3            | <0.0001 ↑                            |
| 12-19 y                                                      | 5.7±0.6             | 4.7±0.4             | 10.6±0.9            | 17.2±0.9            | 19.0±1.3            | <0.0001 ↑                            |
| <b>24-h energy intake, kcal/d</b>                            |                     |                     |                     |                     |                     |                                      |
| 2-5 y                                                        | 1610±19             | 1530±13             | 1550±18             | 1620±22             | 1590±17             | 0.3                                  |
| 6-11 y                                                       | 2060±25             | 1970±21             | 1970±29             | 2000±36             | 2000±22             | 0.5                                  |
| 12-19 y                                                      | 2300±31             | 2250±38             | 2420±30             | 2320±30             | 2270±26             | 0.6                                  |
| <b>Amount of foods and beverages in the 24-h recall, g/d</b> |                     |                     |                     |                     |                     |                                      |
| 2-5 y                                                        | 1430±16             | 1330±14             | 1410±14             | 1470±29             | 1440±19             | 0.002 ↑                              |
| 6-11 y                                                       | 1720±22             | 1650±21             | 1650±25             | 1650±35             | 1620±27             | 0.06                                 |
| 12-19 y                                                      | 1990±29             | 1960±29             | 2150±32             | 2120±37             | 2050±37             | 0.003 ↑                              |
| <b>24-h energy from all beverages, %</b>                     |                     |                     |                     |                     |                     |                                      |
| 2-5 y                                                        | 28±0.3              | 27±0.4              | 24±0.4              | 26±0.5              | 25±0.4              | <0.0001 ↓                            |
| 6-11 y                                                       | 25±0.3              | 25±0.3              | 21±0.5              | 22±0.6              | 20±0.4              | <0.0001 ↓                            |
| 12-19 y                                                      | 24±0.3              | 24±0.4              | 22±0.4              | 24±0.6              | 21±0.3              | 0.0003 ↓                             |
| <b>24-h energy from nutritive beverages, %</b>               |                     |                     |                     |                     |                     |                                      |
| 2-5 y                                                        | 22±0.3              | 20±0.4              | 18±0.3              | 18±0.5              | 19±0.4              | <0.0001 ↓                            |
| 6-11 y                                                       | 20±0.4              | 19±0.4              | 13±0.5              | 12±0.6              | 12±0.3              | <0.0001 ↓                            |
| 12-19 y                                                      | 16±0.4              | 14±0.4              | 9±0.3               | 9±0.3               | 8±0.4               | <0.0001 ↓                            |
| <b>Energy density of foods only, kcal/g</b>                  |                     |                     |                     |                     |                     |                                      |
| 2-5 y                                                        | 2.07±0.02           | 2.08±0.01           | 2.00±0.01           | 2.08±0.03           | 2.07±0.03           | 0.7                                  |
| 6-11 y                                                       | 2.07±0.01           | 2.12±0.02           | 2.13±0.02           | 2.24±0.03           | 2.24±0.02           | <0.0001 ↑                            |
| 12-19 y                                                      | 2.15±0.02           | 2.19±0.01           | 2.28±0.03           | 2.30±0.03           | 2.29±0.02           | <0.0001 ↑                            |
| <b>Number of eating occasions in the 24-h recall, n/d</b>    |                     |                     |                     |                     |                     |                                      |
| 2-5 y                                                        | 5.4±0.05            | 5.3±0.04            | 5.6±0.05            | 5.7±0.07            | 5.9±0.06            | <0.0001 ↑                            |
| 6-11 y                                                       | 4.9±0.05            | 4.9±0.05            | 4.8±0.07            | 5.0±0.06            | 5.2±0.05            | <0.0001 ↑                            |
| 12-19 y                                                      | 4.7±0.04            | 4.5±0.04            | 4.4±0.04            | 4.7±0.04            | 4.7±0.04            | 0.5                                  |
| <b>24-h energy intake from snack episodes, %</b>             |                     |                     |                     |                     |                     |                                      |
| 2-5 y                                                        | 24.3±0.4            | 23.1±0.4            | 25.3±0.4            | 24.9±0.9            | 26.3±0.5            | 0.001 ↑                              |
| 6-11 y                                                       | 20.5±0.5            | 21.0±0.5            | 22.0±0.5            | 23.3±0.6            | 24.9±0.6            | <0.0001 ↑                            |
| 12-19 y                                                      | 24.5±0.5            | 24.6±0.5            | 27.0±0.9            | 24.9±0.5            | 24.1±0.5            | 0.9                                  |

---

Mentioned breakfast in the 24-h recall, %

|         |        |        |        |        |        |           |
|---------|--------|--------|--------|--------|--------|-----------|
| 2-5 y   | 97±0.6 | 97±0.4 | 95±0.8 | 95±0.8 | 96±0.6 | 0.05      |
| 6-11 y  | 93±0.7 | 92±0.6 | 90±0.9 | 87±1.1 | 87±1.3 | <0.0001 ↓ |
| 12-19 y | 76±1.4 | 77±1.2 | 71±1.6 | 68±1.2 | 70±1.3 | <0.0001 ↓ |

---

<sup>1</sup>Values are adjusted means ± SE from multivariable linear or logistic regression models that included each dietary or BMI variable as a continuous or dichotomous dependent. Separate models were run for each age group and included age (continuous), gender, race-ethnicity (NHW, NHB, all others), Survey (NHANES I-1971-74, NHANES II-1976-80, NHANES III-1988-94, NHANES 1999-2002, and NHANES 2003-2008), month of MEC exam (Nov-April, May-Oct), weekday of recalled intake (Monday-Thursday, Friday-Sunday), family PIR (<130, 130-185, ≥350%), education of household head (<12, 12, some college, ≥college), household size (≤2, 3-4, ≥5), and BMI-sex-age-percentile (<85<sup>th</sup>, 85-<95<sup>th</sup>, ≥95<sup>th</sup>). Survey as a trend used the midpoint year of the survey cycle as a scored trend variable. *n* for models with complete covariate information: 2-5 y (11955); 6-11 y (11016); 12-19 y (16223).

<sup>2</sup>Models for BMI excluded month of MEC exam, weekday of recalled intake, and household size.

<sup>3</sup>The direction of the arrow suggests an upward (↑) or a downward (↓) trend.
